# Supplementary material for: Bacillus anthracis Spore Entry into Epithelial Cells Is an Actin-Dependent Process Requiring c-Src and PI3K
Source: PubMed Central journal article supplement (PMC2907395; doi:10.1371/journal.pone.0011665), 2010-07-20

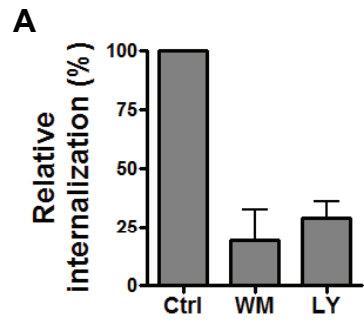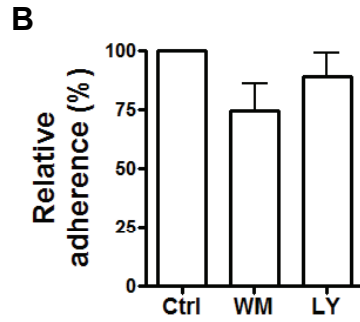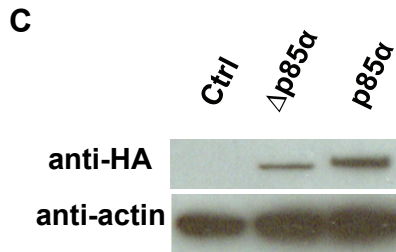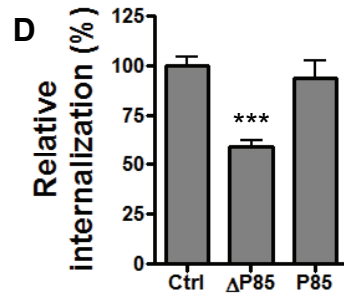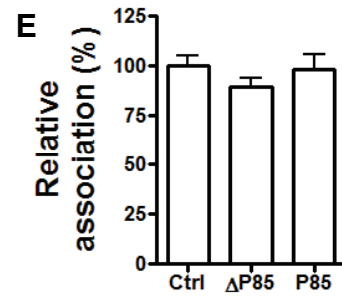

Supplement: pone.0011665.s001.pdf [file pone.0011665.s001.pdf]
